# Supplementary material
Source: publisher figshare collection journal article supplement (https://tandf.figshare.com/ndownloader/files/21761088)
Supplement: Supplementary file 1 [file 21761088]

**Use of Twitter in Disaster Rescue: Lessons learned from Hurricane Harvey**

Volodymyr V. Mihunov1, Nina S. N. Lam1, Lei Zou2, Zheye Wang1, Kejin Wang1

*1 Department of Environmental Sciences, Louisiana State University, Baton Rouge, LA, USA, 70803*

*2 Department of Geography, Texas A&M University, College Station, TX, USA, 77843*

*International Journal of Digital Earth*

**Online Supplementary Materials**

**Appendix A. Online Survey of New Twitter Use – Part 1: Flood Victims - January 2019**

Start of Block: Default Question Block

**Q1** Introduction message

**Q2** Which of the following natural disasters have you experienced in your area of residence?

- Tornado (1)
- Earthquake (2)
- Wildfire (3)
- Hurricane (4)
- Other, please specify (5) ___________

Skip To: End of Block If Q2 != 4

**Q3** During any of the following events, were you a resident of the affected area?

- Hurricane Isaac (1)
- Hurricane Sandy (2)
- Hurricane Matthew (3)
- Hurricane Harvey (4)
- Hurricane Irma (5)

Skip To: End of Block If Q3 != 4

**Q4** Which one of these statements regarding your experience during the Hurricane Harvey are true?

- I evacuated before Hurricane Harvey made landfall on Houston (Aug 25, 2017) (1)
- After Hurricane Harvey made landfall I asked for external assistance (including friends and relatives) for evacuation (2)
- I did not evacuate or asked for evacuation assistance (3)

Skip To: End of Block If Q4 != 2

**Q5** Which method(s) did you use to ask for evacuation assistance? Please check all that apply.

- Called 911 (1)
- Called voluntary organizations (2)
- Called relatives or friends (3)
- Used websites of rescue organizations (4)
- Twitter (5)
- Facebook (6)
- WhatsApp (7)
- Zello app (8)
- Crowdsource rescue (9)
- Other, please specify: (10) _______________

*Skip To: End of Block If Q5 != 5*

**Q6** If you did not evacuate from your home before the flood, what were the reasons? Please check all that apply.

- Did not receive warning information (1)
- Did not think it is necessary to evacuate (2)
- Did not have a place to go (3)
- Lacked transportation resources to evacuate (4)
- Lacked financial resources to evacuate (5)
- Wanted to remain with family or friends (6)
- Other, please explain: (7) ____________

**Q7** If your home was flooded because of Harvey, what was the approximate depth of water outside your home?

- Under 1 foot (2)
- 1 - 2 feet (4)
- 2 - 3 feet (5)
- Above 3 feet (6)
- Wasn't flooded (1)

**Q8** What is the zip code of your home during Hurricane Harvey? _____________

**Q9** How many years have you been living in this zip code? _____________

**Q10** Do you or your household own your home?

- Yes, own home (1)
- No, we rent (2)

**Q11** Which of the following best describes the place where you lived before Hurricane Harvey made landfall?

- Single family detached house with one bedroom (1)
- Single family detached house with two bedrooms (2)
- Single family detached house with more than two bedrooms (3)
- An apartment, condominium, duplex, or townhouse (4)
- A mobile or modular home (5)
- Other, please specify: (6) __________________

**Q12** Did you move to a new home after Hurricane Harvey?

- No (1)
- Yes. Please enter the zip code of your new location: (2) ____________

**Q13** Did you receive any **responses** from the method(s) you used to ask for external assistance? Please check all that apply.

- Police or fire department (1)
- Voluntary organizations (2)
- Relatives or friends (3)
- Through websites of rescue organizations (4)
- Twitter (5)
- Facebook (6)
- WhatsApp (7)
- Crowdsource rescue (8)
- Did not receive any responses (9)
- Other, please specify: (10) ___________________

**Q14** Did you receive any **assistance** for rescue from the method(s) you used? Please check all that apply.

- Police or fire department (1)
- Voluntary organizations (2)
- Relatives or friends (3)
- Through websites of rescue organizations (4)
- Twitter (5)
- Facebook (6)
- WhatsApp (7)
- Crowdsource rescue (8)
- Did not receive any responses (9)
- Other, please specify: (10) ________________

**Q15** How long did it take for you to be rescued?

- Less than 2 hours (1)
- 2-5 hours (2)
- 5-10 hours (3)
- More than 10 hours (4)
- Other, please explain: (5) ____________

**Q16** Which organization rescued you? Please check all that apply.

- Police or fire department (1)
- Coast Guard/National Guard/Texas Guard (2)
- Texas Taskforce 1 or 2 (3)
- *Cajun Navy* or *Texas Navy* (4)
- Individual volunteer (5)
- Relatives or friends (6)
- Other, please explain: (7) ___________

**Q17** Please select the reasons you used Twitter or social media to seek help. Please check all that apply.

- The 911 system could not be connected (1)
- The telephone signal was unstable (2)
- Social media was easy to use (3)
- Social media may reach first responders, friends, and relatives directly (4)
- Used all methods to reach people who can help (5)
- Other, please explain: (6) ________________

**Q18** Did you experience problems regarding the use of Twitter during Hurricane Harvey? Please check all that apply.

- ⊗No, I did not experience any problems (1)
- Lack of information regarding how to get help on Twitter (2)
- Not knowing if the tweets asking for rescue reached first-responders (3)
- Not knowing if the first-responders would send help (4)
- Not knowing how long it would take for the rescue (5)
- Other, please explain: (6) _______________

**Q19** How useful is Twitter for seeking help?

| ⊗Twitter is: (1) | - Extremely useful (1) | - Very useful (2) | - Moderately useful (3) | - Slightly useful (4) | - Not at all useful (5) |
| --- | --- | --- | --- | --- | --- |

**Q20** Have you used hashtags to seek help?

- Yes, please specify which hashtags (1) ____________
- No (2)

**Q21** Please rank the suggestions below according to their usefulness for improvement of Twitter use for future rescue activities, with 1 being the most and 4 being the least useful. Optionally, please provide your own suggestion in the field "other, please specify".

_ Spread awareness about special hashtags for emergency rescue (1)

_ Spread awareness about special accounts for users to contact when they need emergency rescue (2)

_ Provide information, education, and/or training on how to use Twitter for emergency responses (3)

_ Other, please specify: (4)

End of Block: Default Question Block

Start of Block: Block 1

**Q22** New block introduction message

**Q23** What is your gender?

- Male (1)
- Female (2)
- Other (4)

**Q24** What year were you born? _______________

**Q25** What is your race/ethnicity?

- White, non-Hispanic (1)
- White, Hispanic (2)
- African American (3)
- Asian (4)
- American Indian and Alaska Native (5)
- Others, please specify: (6) ____________

**Q26** Were you born in Texas?

- Yes (1)
- No, born in other U.S. state (2)
- No, born outside of United States (3)

**Q27** What language is spoken in your home? Check all that apply.

- English (1)
- Spanish (2)
- Other, please describe: (3) ______________

**Q28** Which statement best describes your employment status at the time of Hurricane Harvey?

- Working full-time (35 or more hours per week) (1)
- Working part-time (less than 35 hours per week) (2)
- Not working (temporary layoff from a job) (3)
- Not working (looking for work) (4)
- Not working (retired) (5)
- Not working (disabled) (6)
- Not working (other, e.g., homemaker) (7)

**Q29** Are you considering moving because of the flood?

- No (1)
- Yes, within Houston (2)
- Yes, within Texas (3)
- Yes, outside Texas (4)
- Don’t know (5)

**Q30** How satisfied are you with living in your current location?

| Extremely satisfied (1) | Somewhat satisfied (2) | Neither satisfied nor dissatisfied (3) | Somewhat dissatisfied (4) | Extremely dissatisfied (5) |
| --- | --- | --- | --- | --- |

**Q31** What was your household income last year before taxes? Please select the category that includes your household income.

- Under $10,000 (1)
- $10,000 - $14,999 (2)
- $15,000 - $24,999 (3)
- $25,000 - $34,999 (4)
- $35,000 - $49,999 (5)
- $50,000 - $74,999 (6)
- $75,000 - $99,999 (7)
- $100,000 - $149,999 (8)
- $150,000 - $199,999 (9)
- $200,000 or more (10)

**Q32** What is the highest degree or level of education you have completed?

- Less than 9th grade (1)
- 9th through 12th grade (no diploma) (2)
- High school graduate (includes equivalency) (3)
- Some college, but no degree (4)
- Associate degree (5)
- Bachelor’s degree (6)
- Graduate or professional degree (7)

**Q33** How many working vehicles do you have access to?

- 0 (1)
- 1 (2)
- 2 (3)
- More than 2 (4)

**Q34** Any additional comments you would like to share? _______________________
